# Supplementary material for: Molecular Surveillance of Canine Degenerative Myelopathy in Breeding Kennels from Romania
Source: MDPI journal article supplement (doi:10.3390/ani13081403), 2023-04-19
Supplement: s1 [file s1]

**Table S1.** Mutant allele frequency obtained in overlapping breeds from the current study and by Zeng et al. [22]

| <b>Dog breed</b>               | <b>Mutant allele frequency<br/>obtained in the current study</b> | <b>Mutant allele frequency<br/>obtained by Zeng et al [22]</b> |
|--------------------------------|------------------------------------------------------------------|----------------------------------------------------------------|
| Wire Fox Terrier               | 1.0000                                                           | 0.9400                                                         |
| German Shepherd                | 0.2000                                                           | 0.3700                                                         |
| Rottweiler                     | 0.0833                                                           | 0.0300                                                         |
| Belgian Shepherd               | 0.0313                                                           | 0.0600                                                         |
| Czechoslovakian Wolfdog        | 0.5000                                                           | 0.3400                                                         |
| Tibetan Mastiff                | 0.0000                                                           | 0.0000                                                         |
| Saint-Bernard                  | 0.0000                                                           | 0.1300                                                         |
| Central Asia Shepherd Dog      | 0.0000                                                           | 0.0000                                                         |
| Labrador Retriever             | 0.0000                                                           | 0.0700                                                         |
| Italian Cane Corso             | 0.0000                                                           | 0.0000                                                         |
| American Staffordshire Terrier | 0.0000                                                           | 0.3300                                                         |
| Beagle                         | 0.0000                                                           | 0.0600                                                         |
| Bull Terrier                   | 0.0000                                                           | 0.0000                                                         |
| Staffordshire Bull Terrier     | 0.0000                                                           | 0.1100                                                         |
| Flat Coated Retriever          | 0.0000                                                           | 0.0500                                                         |
| Dogo Argentino                 | 0.0000                                                           | 0.0000                                                         |
| Golden Retriever               | 0.0000                                                           | 0.0300                                                         |
| Bernese Mountain Dog           | 0.0000                                                           | 0.3800                                                         |
| Shar Pei                       | 0.0000                                                           | 0.0000                                                         |
| American Bulldog               | 0.0000                                                           | 0.0500                                                         |
| French Bulldog                 | 0.0000                                                           | 0.1600                                                         |
